# Supplementary material for: PARP Inhibitors as Monotherapy in Daily Practice for Advanced Prostate Cancers
Source: MDPI journal article supplement (doi:10.3390/jcm11061734), 2022-03-21
Supplement: s1 [file s1]

**Members of the ccAFU:** Charles Dariane, Eric Barret, Jean-Baptiste Beauval, Laurent Brureau, Gilles Créhange, Gaëlle Fiard, Gaëlle Fromont, Mathieu Gauthé, Alain Ruffion, Raphaële Renard-Penna, Romain Mathieu, Paul Sargos, Morgan Rouprêt, Guillaume Ploussard, Guilhem Roubaud
